# Supplementary material for: Fluorescence studies on the interaction between chlorpromazine and model cell membranes
Source: Royal Society of Chemistry journal article supplement (doi:10.1039/c7nj00037e), 2017-01-01
Supplement: c7nj00037e1.pdf [file c7nj00037e1.pdf]

**Electronic Supplementary Information (ESI) for**

**Fluorescence studies on the interaction between chlorpromazine and model cell  
membranes**

Yao-Wen Jiang,<sup>a</sup> Ge Gao,<sup>a</sup> Zhan Chen<sup>b</sup> and Fu-Gen Wu<sup>\*a</sup>

<sup>a</sup> *State Key Laboratory of Bioelectronics, School of Biological Science and Medical Engineering, Southeast University, Nanjing 210096, P. R. China. E-mail: wufg@seu.edu.cn*

<sup>b</sup> *Department of Chemistry, University of Michigan, 930 North University Avenue, Ann Arbor, Michigan 48109, United States*

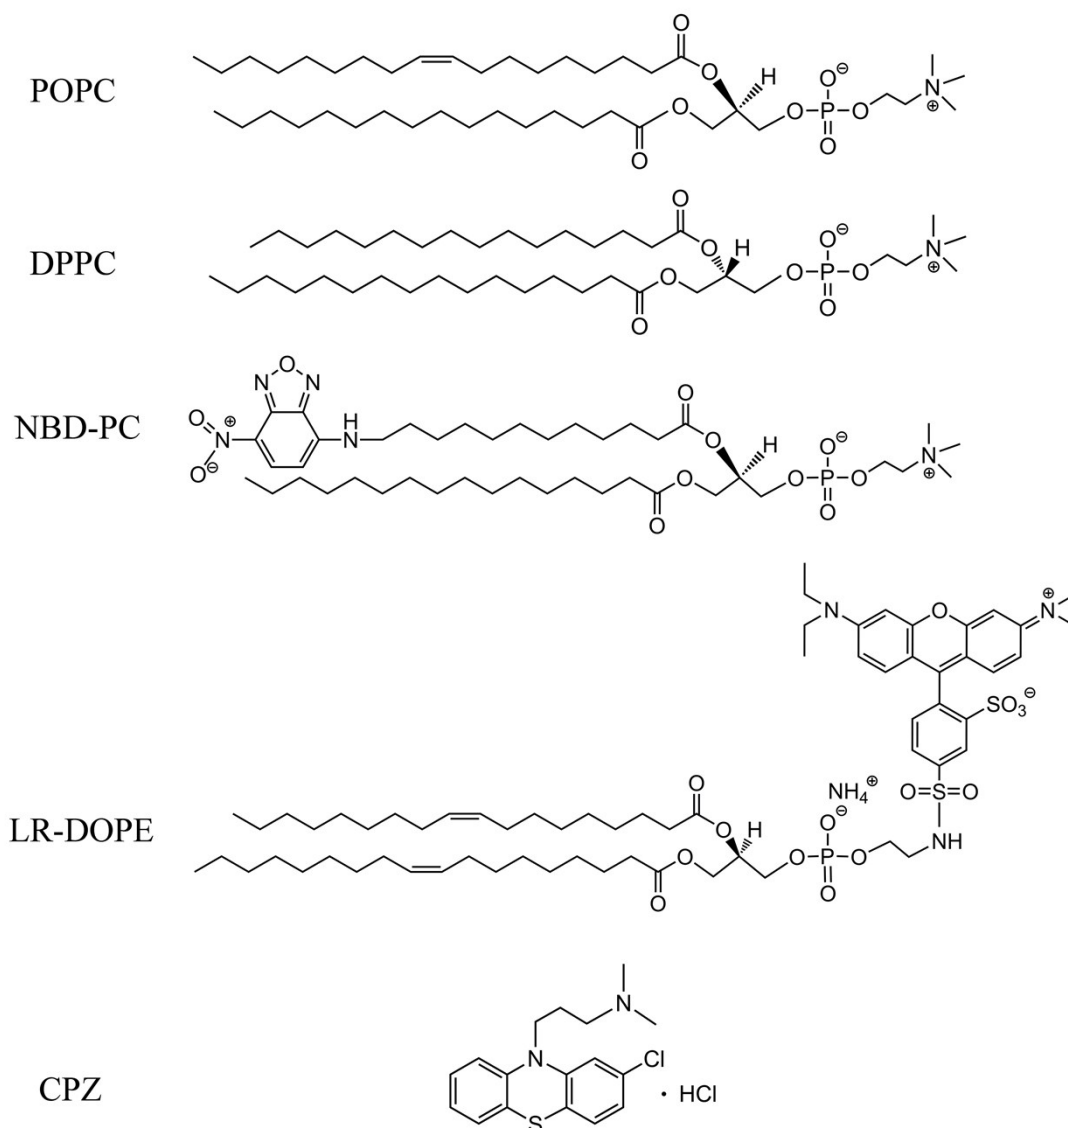

**Fig. S1** Molecular structures of 1-palmitoyl-2-oleoyl-*sn*-glycero-3-phosphocholine (POPC), 1,2-dipalmitoyl-*sn*-glycero-3-phosphocholine (DPPC), 1-palmitoyl-2-{12-[(7-nitro-2-1,3-benzoxadiazol-4-yl)amino]dodecanoyl}-*sn*-glycero-3-phosphocholine (NBD-PC), 1,2-dioleoyl-*sn*-glycero-3-phosphoethanolamine-*N*-(lissamine rhodamine B sulfonyl) (ammonium salt) (LR-DOPE) and chlorpromazine hydrochloride (CPZ).

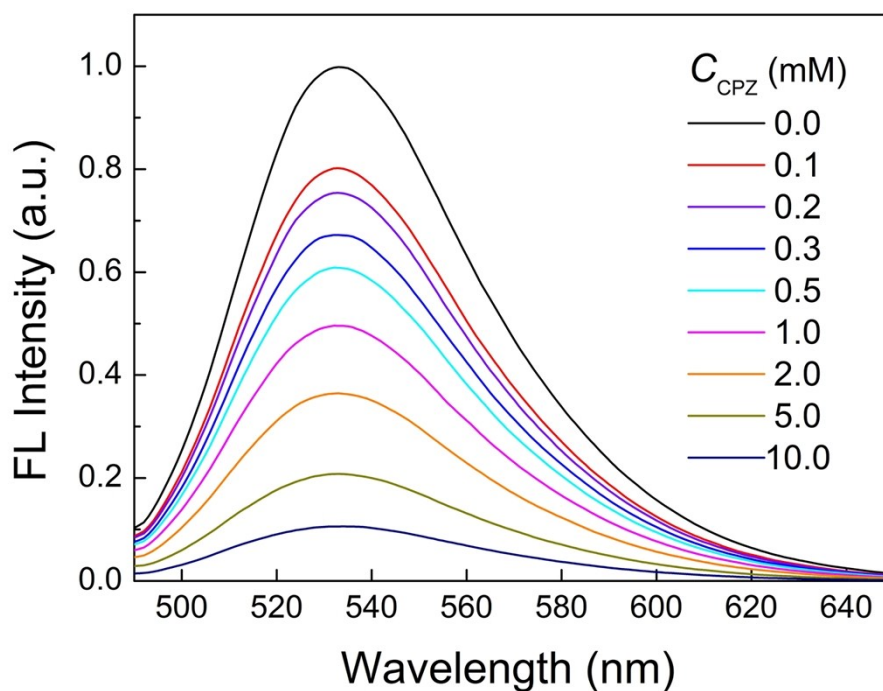

**Fig. S2** Fluorescence spectra of DPPC liposomes (containing 1 mol % NBD-PC) interacting with different concentrations of CPZ (0.0–10.0 mM).

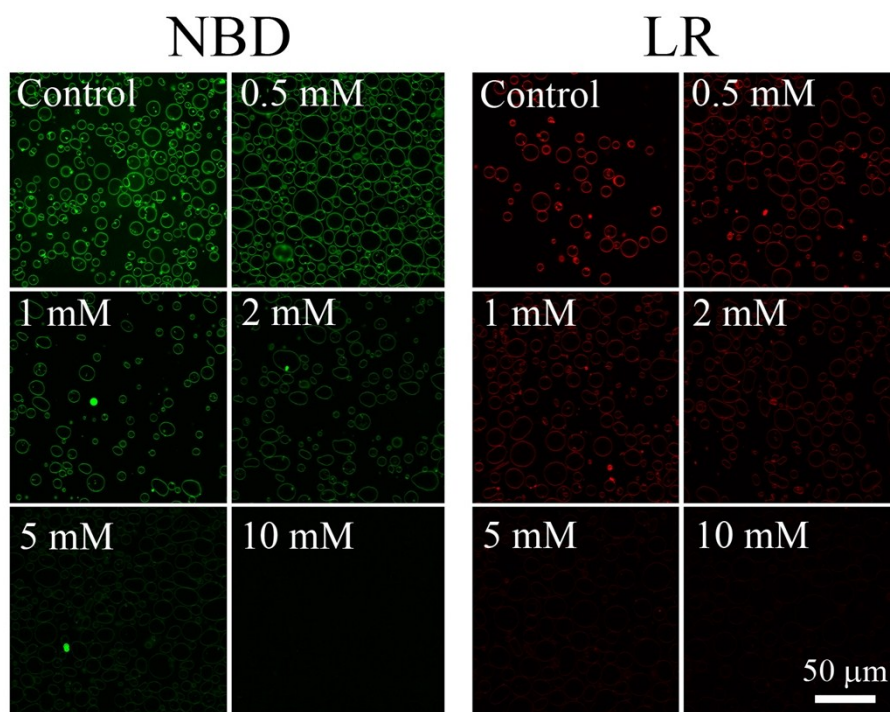

**Fig. S3** Confocal fluorescence images of POPC giant unilamellar vesicles (GUVs) interacting with different concentrations of CPZ (0.0–10.0 mM). GUVs containing 1 mol % NBD-PC (Left) and GUVs containing 1 mol % LR-DOPE (Right).

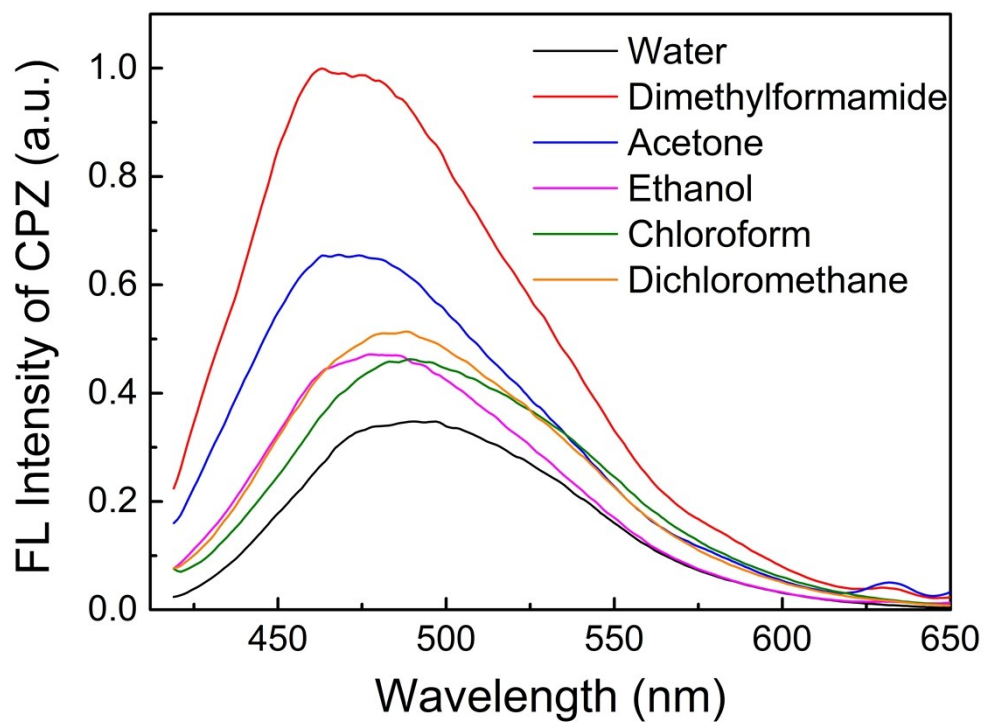

**Fig. S4** Fluorescence emission spectra of 10.0 mM CPZ excited at 405 nm in different solvents.

**Table S1** Parameters of the fitting curves in Fig. 10.

|                         | <b>NBD</b>  |          | <b>LR</b>   |          |
|-------------------------|-------------|----------|-------------|----------|
|                         | without CPZ | with CPZ | without CPZ | with CPZ |
| Reduced Chi-Squares     | 2545.4      | 3275.4   | 2989.1      | 7180.7   |
| Degree of Freedom       | 778         | 539      | 466         | 466      |
| Residual Sum of Squares | 1.9803E6    | 1.7654E6 | 1.3929E6    | 3.3462E6 |
| Adj. R-Square           | 0.99949     | 0.99858  | 0.99937     | 0.99661  |
